# Supplementary material
Source: publisher site journal article supplement (https://www.dovepress.com/article/517476)
Supplement: Supplementary file 1 [file 517476%20Supplementary%20Material.docx]

Appendix 1: Survey items

| Original survey (14 items) |
| --- |
| I have clearly articulated career goals |
| I am aware of my strengths & weaknesses |
| I recognize my values & priorities |
| I have skills to navigate own success |
| I am comfortable negotiating for what I need to succeed |
| I have a strategy for managing my time & competing demands |
| I am capable of professionally managing conflict in the work place |
| I understand the promotions process at Weil Cornell Medicine |
| I have an identified mentor who meaningfully contributes to my success |
| I look forward to coming to work |
| I feel confident in ability to progress in my career |
| I am satisfied with how my career is advancing |
| I have an environment of support & guidance to help me achieve my career goals |
| I find my work to be personally satisfying |
| Additional items to assess new curricular content (3 items) |
| I am confident in my ability to present my academic work |
| I feel informed about how to get my work published |
| I am capable of providing effective feedback |
| Additional items to assess institutional retention and leadership readiness (4 items) |
| I am comfortable motivating & managing other professional people |
| I feel a high degree of personal ownership for my unit/division/department |
| I feel I can impact change in my professional area |
| I have no interest or intention to leave my current job |
